# Supplementary material
Source: PubMed Central journal article supplement (PMC3660434)
Supplement: NIHMS450182-supplement-01.pdf [file NIHMS450182-supplement-01.pdf]

## Supplementary Information

**Table S1: yeast strains used for this study**

| <b>Name</b> | <b>Genotype</b>                     | <b>reference</b>        |
|-------------|-------------------------------------|-------------------------|
| NSY1471     | wild type                           | (Scrivens et al., 2009) |
| NSY1472     | <i>trs20ts</i>                      | (Scrivens et al., 2009) |
| NSY1517     | Bet3-GFP                            | this study              |
| NSY1518     | BET3-GFP/ <i>trs20ts</i>            | this study              |
| NSY1515     | TRS130-GFP                          | this study              |
| NSY1516     | TRS130-GFP/ <i>trs20ts</i>          | this study              |
| NSY1513     | TRS120-GFP                          | this study              |
| NSY1514     | TRS120-GFP/ <i>trs20ts</i>          | this study              |
| NSY1519     | TRS120-myc                          | this study              |
| NSY1520     | TRS120-myc/ <i>trs20ts</i>          | this study              |
| NSY1521     | TRS130-HA                           | this study              |
| NSY1522     | TRS130-HA/ <i>trs20ts</i>           | this study              |
| NSY752      | PJ469-4 $\alpha$                    | (James et al., 1996)    |
| NSY468      | PJ469-4a                            | (James et al., 1996)    |
| NSY1523     | TRS20::HygMX + pNS1397              | this study              |
| NSY1524     | TRS20::HygMX + pNS1398              | this study              |
| NSY1525     | TRS20::HygMX + pNS1399              | this study              |
| NSY128      | wild type                           | D. Botstein, DBY4975    |
| NSY 862     | COP1-RFP                            | (Huh et al., 2003)      |
| NSY 863     | CHC1-RFP                            | (Huh et al., 2003)      |
| NSY1547     | TRS130-GFP/CHC1-RFP                 | this study              |
| NSY1548     | TRS130-GFP/CHC1-RFP/ <i>trs20ts</i> | this study              |
| NSY1549     | TRS120-GFP/CHC1-RFP                 | this study              |
| NSY1550     | TRS120-GFP/CHC1-RFP/ <i>trs20ts</i> | this study              |
| NSY1551     | BET3-GFP/CHC1-RFP                   | this study              |
| NSY1552     | BET3-GFP/CHC1-RFP/ <i>trs20ts</i>   | this study              |
| NSY1553     | BET3-GFP/COP1-RFP                   | this study              |
| NSY1554     | BET3-GFP/COP1-RFP/ <i>trs20ts</i>   | this study              |
| NSY1555     | <i>trs20ts</i>                      | this study              |
| NSY1556     | <i>trs20D46Y</i>                    | this study              |
| NSY1557     | wild type                           | this study              |

**Table S2: Plasmids used for this study**

| <b>Name</b> | <b>backbone</b> | <b>insert(s)</b>                   | <b>reference</b>            |
|-------------|-----------------|------------------------------------|-----------------------------|
| pNS981      | pCDFDuet-1      | His <sub>6</sub> -TRS120           | (Tokarev et al., 2009)      |
| pNS1000     | pETDuet-1       | GST-BET5 + TRS23-S                 | this study                  |
| pNS1043     | pRSFDuet-1      | BET3-MBP + TRS31-myc               | this study                  |
| pNS1436     | pCDFDuet-1      | His <sub>6</sub> -TRS33            | this study                  |
| pNS1437     | pCDFDuet-1      | His <sub>6</sub> -TRS33 + TRS20-HA | this study                  |
| pNS1385     | pCDFDuet-1      | TRS20-HA                           | this study                  |
| pNS1386     | pCDFDuet-1      | <i>trs20ts</i> -HA                 | this study                  |
| pNS1387     | pCDFDuet-1      | <i>trs20D46Y</i> -HA               | this study                  |
| pNS422      | pYEX4T-1        | GST                                | (Martzen et al., 1999)      |
| pNS424      | pYEX4T-1        | GST-BET5                           | (Martzen et al., 1999)      |
| pNS206      | pGBDU-C2        | none                               | (James et al., 1996)        |
| pNS1115     | pGBDU-C2        | TRS120                             | this study                  |
| pNS1106     | pGBDU-C2        | BET3                               | this study                  |
| pNS196      | pACT2           | none                               | Clontech Laboratories, Inc. |
| pNS1152     | pACT2           | TRS20                              | this study                  |
| pNS1395     | pACT2           | <i>trs20D46Y</i>                   | this study                  |
| pNS1394     | pACT2           | <i>trs20ts</i>                     | this study                  |
| pNS1096     | pACT2           | BET3                               | this study                  |
| pNS1396     | pRS316          | TRS20                              | this study                  |
| pNS1397     | pRS315          | TRS20                              | this study                  |
| pNS1398     | pRS315          | <i>trs20D46Y</i>                   | this study                  |
| pNS1399     | pRS315          | <i>trs20ts</i>                     | this study                  |
| pNS1432     | pRS416          | CFP-N-BET3                         | this study                  |
| pNS1428     | pRS413          | CFP-C-TRS20                        | this study                  |
| pNS1429     | pRS413          | CFP-C- <i>trs20D46Y</i>            | this study                  |
| pNS1435     | pRS413          | YFP-C-TRS120                       | this study                  |
| pNS1433     | pRS416          | YFP-N-TRS20                        | this study                  |
| pNS1434     | pRS416          | YFP-N- <i>trs20D46Y</i>            | this study                  |
| pNS661      | pRS315          | GFP-YPT31                          | R. Collins, pRC647          |
| pNS1430     | pRS315          | yEVENUS-YPT1                       | this study                  |

## Supplemental Methods

### Construction of Yeast Strains

The *trs20ts* and its cognate wild type strain (NSY1471 and 1472) were a generous gift from M. Sacher. Strains expressing Trs120-myc and Trs130-HA were constructed by mating *trs20ts* with NSY1176 (Trs130-HA::HIS3/Trs120-myc::TRP1), followed by sporulation and tetrad dissection. Strains expressing Chc1-RFP in wild type and *trs20ts* were created by PCR and homologous recombination of RFP::KanMX into NSY1471 and 1472. Trs130, Trs120, and Bet3 were then tagged with yEGFP in these strains by PCR and homologous recombination of yEGFP::HygMX. Similarly, wild type and *trs20ts* strains expressing COPI-mCherry were created by PCR and homologous recombination of mCherry::HygMX into NSY1471 and 1472. Bet3 was then tagged with GFP in these strains using yEGFP::KanMX. Strains expressing Trs20 wild type, Trs20-D46Y, or Trs20ts on plasmids covering *trs20Δ* were created by transforming *TRS20* in pRS316 into NSY1471, deleting *TRS20* from the chromosome via homologous recombination using Hygromycin B resistance, transforming the resulting strain with *TRS20* wild type, *trs20-D46Y*, or *trs20ts* expressed from pRS315, and selecting the final strains from 5-FOA plates. Wild type, *trs20ts*, and *trs20D46Y* strains used for Ypt1 and Ypt31 localization were created by PCR and homologous recombination of a *TRS20*, *trs20V92A/F133S*, or *trs20D46Y-HygMX* cassette into the *TRS20* locus.

### Construction of Plasmids

Plasmids pNS1015, 981, 1000, 1043, 1385, and 1387 were used for bacterial expression. The remaining plasmids were transformed into yeast. All plasmids constructed for this study were created using PCR, restriction digestion, and ligation into the destination vector, unless indicated otherwise. For pNS1015 and 1000, the GST tag was first subcloned from pET41a (Novagen) into pETDuet-1 (Novagen) before adding the TRAPP subunits. For pNS1043, MBP was subcloned from pMAL-C2X (NEB) into pRSFDuet-1 (Novagen). The myc and HA epitopes were added to Trs31 and Trs20, respectively, by engineering the sequence into the reverse primer during cloning. For cloning wild type or mutant *TRS20* into pRS vectors, *TRS20*, along with 400 base pairs upstream and 200 downstream, was sub-cloned from *TRS20* in pRS425, a generous gift from Michael Sacher. To create *trs20-D46Y* and *trs20ts* mutants in each vector, PCR-based mutagenesis was utilized to mutate T275C and T398C (for the V92A and F133S amino acid substitutions in the *trs20ts* constructs) or G136T (for D46Y) from the wild type DNA sequence. To construct the BiFC plasmids, *TRS120* was cloned in frame with YFP-C into pNS1426 (YFP-C in pRS413). *TRS20* or *trs20-D46Y* were cloned in frame with YFP-C into pNS1425 (YFP-N in pRS416). *BET3*

was cloned in frame with CFP-N into pNS1431 (CFP-N in pRS415) (Lipatova et al., 2012).

### Cell Fractionation

To calculate membrane attachment of Trs120 and Trs130, cells were grown to mid-log phase at 26° in synthetic dextrose medium, and 50 OD<sub>600</sub> units were harvested. 37° samples were shifted to 37° for 90 minutes before harvesting cells. Cells were lysed using glass beads in the same way as for the yeast pull-down experiments, and lysates pre-cleared at 1000 g for 5 minutes. Lysates were then centrifuged at 100,000 g for 60 minutes; membrane (P100) and supernatant (S100) fractions were collected. Membrane fractions were resuspended in lysis buffer, TCA was added to added to both fractions, to a final concentration of 10%. Proteins were washed twice with 400μl acetone, resuspended in 50μl laemmli buffer, and run on 9% acrylamide gels.

### Supplemental References

- HUH, W.K., FALVO, J.V., GERKE, L.C., CARROLL, A.S., HOWSON, R.W., WEISSMAN, J.S., O'SHEA, E.K. (2003) Global analysis of protein localization in budding yeast. *Nature*, 425, 686-91.
- JAMES, P., HALLADAY, J. & CRAIG, E. A. (1996) Genomic libraries and a host strain designed for highly efficient two-hybrid selection in yeast. *Genetics*, 144, 1425-36.
- LIPATOVA, Z., BELOGORTSEVA, N., ZHANG, X. Q., KIM, J., TAUSSIG, D. & SEGEV, N. (2012) Regulation of selective autophagy onset by a Ypt/Rab GTPase module. *Proc Natl Acad Sci U S A*, 109, 6981-6.
- MARTZEN, M. R., MCCRAITH, S. M., SPINELLI, S. L., TORRES, F. M., FIELDS, S., GRAYHACK, E. J. & 20PHIZICKY, E. M. (1999) A biochemical genomics approach for identifying genes by the activity of their products. *Science*, 286, 1153-5.
- SCRIVENS, P. J., SHAHRZAD, N., MOORES, A., MORIN, A., BRUNET, S. & SACHER, M. (2009) TRAPPC2L is a novel, highly conserved TRAPP-interacting protein. *Traffic*, 10, 724-36.
- TOKAREV, A. A., TAUSSIG, D., SUNDARAM, G., LIPATOVA, Z., LIANG, Y., MULHOLLAND, J. W. & SEGEV, N. (2009) TRAPP II complex assembly requires Trs33 or Trs65. *Traffic*, 10, 1831-44.

## Supplemental Figure Legends

**FigureS1: GST-pull-down of bacterial TRAPP subunits.** **A.** Shown is the full anti-His<sub>6</sub> immuno-blot of lysate (left) and pull-downs used in Figure 1A. Cleared bacterial lysate (S100) expressing His<sub>6</sub>-Trs120 was used for GST-pull-down, as in Figure 1A. In the pull-down lanes, the His<sub>6</sub>-tagged Trs120 and Trs33 can be seen. **B.** Tca17-S does not attach to GST-Bet5 complexes. This experiment was done as described for Figure 1A, except that the effect of expressing S-tagged Tca17 together with TRAPP I core + Trs33 was determined. Tca17 was expressed (lysates, left), but it did not co-precipitate with GST-Bet5 complexes and did not affect the association of Trs120 with TRAPP I (pull-downs, right). Trs20 is shown as a positive control for the pull-down.

**Figure S2. The effect of the *trs20ts* mutation on membrane attachment of Trs120 and Trs130.** Cells expressing GFP-tagged Trs120 (top) or Trs130 (bottom) were grown at 26°C and shifted to 37°C for 90 minutes. Cell lysates were subjected to 100,000 g spin, and the level of Trs120 or Trs130 in the total (T), pellet (P) and sup (S), was determined using immuno-blot analysis and anti-GFP antibodies. The bands were quantified and the percent of Trs120 and Trs130 in the P100 (P) fraction is shown under the blots; +/- represents SD of results from two independent experiments. The levels of Trs120 and Trs130 in the P100 fraction are lower in *trs20ts* mutant cells when compared to wild type cells.
